# Supplementary material for: The evolution of acoustic size exaggeration in terrestrial mammals
Source: PubMed Central journal article supplement (PMC5025854; doi:10.1038/ncomms12739), 2016-09-06
Supplement: ncomms12739-s1.pdf [file ncomms12739-s1.pdf]

Supplementary Tables

Supplementary Table 1. Results from the ten best supported PGLS regression models fitted to explain variance in male  $\log_{10}$  F0 with male  $\log_{10}$  body mass across 67 terrestrial mammal species.

| Model          | (Intercept) | $\log_{10}$ male body mass | Call type | Habitat | Mating system | df | AICc   |
|----------------|-------------|----------------------------|-----------|---------|---------------|----|--------|
| BM + $\lambda$ | 4.31        | -0.50***                   |           |         |               | 4  | 120.64 |
| OLS            | 4.69        | -0.54***                   |           |         |               | 4  | 121.77 |
| OU             | 4.69        | -0.54***                   |           |         |               | 4  | 121.77 |
| BM + $\lambda$ | 4.28        | -0.52***                   |           | +       |               | 5  | 123.65 |
| OLS            | 4.59        | -0.56***                   |           | +       |               | 5  | 124.00 |
| OU             | 4.59        | -0.56***                   |           | +       |               | 5  | 124.00 |
| BM + $\lambda$ | 4.35        | -0.49***                   | +         |         |               | 5  | 124.48 |
| OLS            | 4.74        | -0.54***                   | +         |         |               | 5  | 125.67 |
| OU             | 4.74        | -0.54***                   | +         |         |               | 5  | 125.67 |
| BM + $\lambda$ | 4.32        | -0.51***                   | +         | +       |               | 6  | 127.67 |

The PGLS regression models are ordered by AICc value so that the best supported model (with the lowest AICc value) is first in the list. "+" denotes factor included in the model and statistically significant independent variables are indicated with asterisks (\* P < 0.05, \*\* P < 0.01, \*\*\* P < 0.001). OLS = non-phylogenetic (ordinary least squares) model, BM +  $\lambda$  = Brownian motion + Pagel's lambda, OU = Ornstein-Uhlenbeck model.

Supplementary Table 2. Results from the ten best supported PGLS regression models fitted to explain variance in male  $\log_{10}$   $\Delta$ F with male  $\log_{10}$  body mass across 35 terrestrial mammal species.

| Model          | (Intercept) | $\log_{10}$ male body mass | Call type | Habitat | Mating system | df | AICc   |
|----------------|-------------|----------------------------|-----------|---------|---------------|----|--------|
| BM             | 4.03        | -0.34***                   |           | +**     |               | 4  | -17.76 |
| OU             | 4.16        | -0.36***                   |           | +**     |               | 5  | -15.97 |
| BM             | 4.00        | -0.30***                   |           |         |               | 3  | -15.57 |
| BM + $\lambda$ | 4.04        | -0.34***                   |           | +**     |               | 5  | -15.40 |
| BM             | 4.05        | -0.33***                   | +         | +**     |               | 5  | -13.84 |
| OU             | 4.06        | -0.30***                   |           |         |               | 4  | -13.48 |
| BM + $\lambda$ | 4.00        | -0.30***                   |           |         |               | 4  | -13.01 |
| BM + $\lambda$ | 3.95        | -0.30***                   | +*        | +**     |               | 6  | -12.43 |
| OU             | 4.15        | -0.35***                   | +         | +**     |               | 6  | -11.62 |
| BM + $\lambda$ | 3.81        | -0.23***                   | +*        |         |               | 5  | -10.72 |

The PGLS regression models are ordered by AICc value so that the best supported model (with the lowest AICc value) is first in the list. "+" denotes factor included in the model and statistically significant independent variables are indicated with asterisks (\* P < 0.05, \*\* P < 0.01, \*\*\* P < 0.001). BM = Brownian motion, BM +  $\lambda$  = Brownian motion + Pagel's lambda, OU = Ornstein-Uhlenbeck model.

Supplementary Table 3. Results from the ten best supported PGLS regression models fitted to explain variance in male  $\log_{10}$  F0 with male size dimorphism across 67 terrestrial mammal species.

| Model          | (Intercept) | Size dimorphism | $\log_{10}$ male body mass | Call type | Habitat | Mating system | df | AICc   |
|----------------|-------------|-----------------|----------------------------|-----------|---------|---------------|----|--------|
| BM + $\lambda$ | 9.26        | -4.93           | -0.47***                   |           |         |               | 5  | 116.39 |
| OU             | 7.69        | -2.97           | -0.53***                   |           |         |               | 5  | 119.09 |
| BM + $\lambda$ | 9.51        | -5.21           | -0.49***                   |           | +       |               | 6  | 119.20 |
| BM + $\lambda$ | 9.70        | -5.31           | -0.45***                   |           | +       |               | 6  | 119.94 |
| BM + $\lambda$ | 10.61       | -6.45*          | -0.46***                   |           |         | +             | 9  | 122.24 |
| OU             | 7.95        | -3.17           | -0.52***                   |           | +       |               | 6  | 122.94 |
| BM + $\lambda$ | 9.87        | -5.53           | -0.47***                   |           | +       |               | 7  | 123.01 |
| BM + $\lambda$ | 11.01       | -6.89*          | -0.49***                   |           | +       | +             | 10 | 124.57 |
| BM + $\rho$    | 10.23       | -5.66           | -0.49***                   |           |         |               | 5  | 125.20 |
| OU             | 8.24        | -3.56           | -0.54***                   |           |         | +             | 9  | 125.37 |

The PGLS regression models are ordered by AICc value so that the best supported model (with the lowest AICc value) is first in the list. "+" denotes factor included in the model and statistically significant independent variables are indicated with asterisks (\* P < 0.05, \*\* P < 0.01, \*\*\* P < 0.001). BM +  $\lambda$  = Brownian motion + Pagel's lambda, BM +  $\rho$  = Brownian motion + Grafen's rho, OU = Ornstein-Uhlenbeck model.

Supplementary Table 4. Results from the ten best supported PGLS regression models fitted to explain variance in male  $\log_{10}$   $\Delta$ F with male size dimorphism across 35 terrestrial mammal species.

| Model          | (Intercept) | Size dimorphism | $\log_{10}$ male body mass | Call type | Habitat | Mating system | df | AICc   |
|----------------|-------------|-----------------|----------------------------|-----------|---------|---------------|----|--------|
| BM             | 7.58        | -3.58**         | -0.31***                   |           | +**     |               | 5  | -25.22 |
| BM + $\lambda$ | 8.27        | -4.25**         | -0.31***                   |           | +**     |               | 6  | -23.75 |
| OU             | 7.90        | -3.80**         | -0.32***                   |           | +**     |               | 6  | -23.19 |
| BM             | 7.82        | -3.86**         | -0.26***                   |           |         |               | 4  | -23.05 |
| OU             | 8.23        | -4.17**         | -0.27***                   |           |         |               | 5  | -21.03 |
| BM             | 7.45        | -3.44**         | -0.30***                   |           | +       | +**           | 6  | -20.90 |
| BM + $\lambda$ | 8.18        | -4.20**         | -0.26***                   |           |         |               | 5  | -20.61 |
| OU             | 7.71        | -3.61**         | -0.31***                   |           | +       | +**           | 7  | -18.35 |
| BM + $\lambda$ | 8.06        | -4.03**         | -0.30***                   |           | +       | +**           | 7  | -18.29 |
| BM             | 7.74        | -3.77**         | -0.25***                   |           | +       |               | 5  | -17.48 |

The PGLS regression models are ordered by AICc value so that the best supported model (with the lowest AICc value) is first in the list. "+" denotes factor included in the model and statistically significant independent variables are indicated with asterisks (\* P < 0.05, \*\* P < 0.01, \*\*\* P < 0.001). BM = Brownian motion, BM +  $\lambda$  = Brownian motion + Pagel's lambda, OU = Ornstein-Uhlenbeck model.

Supplementary Table 5. Results from the ten best supported PGLS regression models fitted to explain variance in male  $\log_{10}$  F0 with  $\log_{10}$  male relative testes size across 42 terrestrial mammal species.

| Model          | (Intercept) | $\log_{10}$ relative testes size | $\log_{10}$ male body mass | Call type | Habitat | Mating system | df | AICc  |
|----------------|-------------|----------------------------------|----------------------------|-----------|---------|---------------|----|-------|
| OU             | 4.45        | 0.39*                            | -0.42***                   |           |         |               | 5  | 86.24 |
| BM             | 3.93        | 0.33*                            | -0.36***                   |           |         |               | 4  | 86.84 |
| BM + $\lambda$ | 4.15        | 0.33*                            | -0.41***                   |           |         |               | 5  | 87.16 |
| OU             | 4.41        | 0.36*                            | -0.45***                   |           | +       |               | 6  | 88.88 |
| BM             | 3.90        | 0.31*                            | -0.37**                    |           | +       |               | 5  | 89.86 |
| BM + $\lambda$ | 4.12        | 0.31                             | -0.42***                   |           | +       |               | 6  | 90.32 |
| OU             | 4.49        | 0.40*                            | -0.41***                   |           | +       |               | 6  | 90.34 |
| OLS            | 4.65        | 0.48*                            | -0.44***                   |           |         |               | 4  | 90.44 |
| BM             | 3.93        | 0.33*                            | -0.35***                   |           | +       |               | 5  | 91.05 |
| BM + $\rho$    | 4.46        | 0.43*                            | -0.42***                   |           |         |               | 5  | 91.06 |

The PGLS regression models are ordered by AICc value so that the best supported model (with the lowest AICc value) is first in the list. "+" denotes factor included in the model and statistically significant independent variables are indicated with asterisks (\* P < 0.05, \*\* P < 0.01, \*\*\* P < 0.001). OLS = non-phylogenetic (ordinary least squares) model, BM = Brownian motion, BM +  $\lambda$  = Brownian motion + Pagel's lambda, BM +  $\rho$  = Brownian motion + Grafen's rho, OU = Ornstein-Uhlenbeck model.

Supplementary Table 6. Results from the ten best supported PGLS regression models fitted to explain variance in male  $\log_{10}$   $\Delta$ F with male relative testes size across 24 terrestrial mammal species.

| Model          | (Intercept) | $\log_{10}$ relative testes size | $\log_{10}$ male body mass | Call type | Habitat | Mating system | df | AICc  |
|----------------|-------------|----------------------------------|----------------------------|-----------|---------|---------------|----|-------|
| BM + $\lambda$ | 4.12        | 0.10***                          | -0.31***                   |           |         |               | 5  | -6.70 |
| BM             | 4.10        | 0.10**                           | -0.31***                   |           |         |               | 4  | -5.78 |
| BM + $\lambda$ | 4.15        | 0.10**                           | -0.34***                   |           | +       |               | 6  | -3.75 |
| BM             | 4.15        | 0.09**                           | -0.34***                   |           | +       |               | 5  | -3.65 |
| OU             | 4.10        | 0.10**                           | -0.31***                   |           |         |               | 5  | -2.55 |
| BM + $\rho$    | 4.14        | 0.11**                           | -0.32***                   |           |         |               | 5  | -2.27 |
| BM + $\rho$    | 4.06        | 0.09**                           | -0.33***                   |           | +       |               | 6  | 0.57  |
| BM + $\lambda$ | 4.11        | 0.11**                           | -0.31***                   |           | +       |               | 6  | 1.18  |
| BM             | 4.11        | 0.10**                           | -0.31***                   |           | +       |               | 5  | 1.29  |
| BM             | 4.15        | 0.09**                           | -0.34***                   |           | +       | +             | 6  | 3.94  |

The PGLS regression models are ordered by AICc value so that the best supported model (with the lowest AICc value) is first in the list. "+" denotes factor included in the model and statistically significant independent variables are indicated with asterisks (\* P < 0.05, \*\* P < 0.01, \*\*\* P < 0.001). BM = Brownian motion, BM +  $\lambda$  = Brownian motion + Pagel's lambda, BM +  $\rho$  = Brownian motion + Grafen's rho, OU = Ornstein-Uhlenbeck model.

Supplementary Table 7. Acoustic, morphological and ecological data for each of the terrestrial mammal species in the dataset

| Species                            | Habitat     | Mating system | Male body mass (g) | Size Dimorphism | Male body mass for testes data (g) | Testes mass (g) | Mean F0 (Hz) | Mean ΔF (Hz) | References |
|------------------------------------|-------------|---------------|--------------------|-----------------|------------------------------------|-----------------|--------------|--------------|------------|
| <i>Ailuropoda melanoleuca</i>      | Terrestrial | PO            | 117900             | 1.02            | 117180                             | 274.7*          | 372          | 555          | 1,2        |
| <i>Alces alces</i>                 | Terrestrial | PO            | 323000             | 1.02            | 789000                             | 106.0           | 125          | -            | 3-6        |
| <i>Alopex lagopus</i>              | Terrestrial | MO            | 3500               | 1.02            | 4800                               | 4.1             | 990          | -            | 7-9        |
| <i>Alouatta caraya</i>             | Arboreal    | PR            | 6400               | 1.05            | 64000                              | 17.0*           | 50           | 535          | 5,10       |
| <i>Alouatta guariba</i>            | Arboreal    | PO            | 6700               | 1.04            | 67000                              | 8.5*            | -            | 478          | 10         |
| <i>Alouatta macconnellii</i>       | Arboreal    | PO            | 7600               | 1.05            | -                                  | -               | -            | 393          | 10         |
| <i>Alouatta palliata</i>           | Arboreal    | PO            | 5800               | 1.03            | 7260                               | 23.0            | -            | 581          | 4,5,10     |
| <i>Alouatta pigra</i>              | Arboreal    | PO            | 7600               | 1.07            | 76000                              | 11.5*           | -            | 445          | 10,11      |
| <i>Alouatta seniculus</i>          | Arboreal    | PO            | 6700               | 1.04            | 67000                              | 3.6*            | -            | 418          | 5,10       |
| <i>Bison bison</i>                 | Terrestrial | PO            | 863410             | 1.04            | 299400                             | 439.8           | 55           | 317          | 5,12-14    |
| <i>Brachyteles hypoxanthus</i>     | Arboreal    | PR            | 9600               | 1.01            | -                                  | -               | 1731         | -            | 15         |
| <i>Callithrix jacchus</i>          | Arboreal    | MO            | 369                | 1.01            | 320                                | 1.3             | 7435         | -            | 4,15       |
| <i>Capreolus capreolus</i>         | Terrestrial | PO            | 23025              | 1.01            | 20500                              | 45.0            | 200          | 760          | 5,6,9      |
| <i>Cebus capucinus</i>             | Arboreal    | PR            | 3626               | 1.05            | -                                  | -               | 731          | -            | 15         |
| <i>Cercocebus atys</i>             | Arboreal    | PR            | 10553              | 1.06            | -                                  | -               | 77           | -            | 15         |
| <i>Cercopithecus diana</i>         | Arboreal    | PO            | 8700               | 1.03            | -                                  | -               | 60           | 900          | 11,16,17   |
| <i>Cercopithecus mona</i>          | Arboreal    | PO            | 4566               | 1.06            | -                                  | -               | 334          | -            | 15         |
| <i>Cercopithecus nictitans</i>     | Arboreal    | PO            | 6633               | 1.05            | -                                  | -               | 220          | 629          | 4,18       |
| <i>Cervus elaphus canadensis</i>   | Terrestrial | PO            | 289750             | 1.02            | -                                  | -               | 145          | 222          | 5,19       |
| <i>Cervus elaphus corsicanus</i>   | Terrestrial | PO            | 88000              | 1.03            | -                                  | -               | 40           | 256          | 3,20       |
| <i>Cervus elaphus scoticus</i>     | Terrestrial | PO            | 125000             | 1.04            | 122000                             | 218.0           | 112          | 247          | 4,5,21     |
| <i>Cervus nippon</i>               | Terrestrial | PO            | 39450              | 1.04            | -                                  | -               | 933^         | -            | 5,22       |
| <i>Colobus guereza</i>             | Arboreal    | PO            | 13390              | 1.04            | 10400                              | 3.0             | 18^          | 717          | 11,23,24   |
| <i>Cryptomys hottentotus</i>       | Terrestrial | PA            | 90                 | 1.06            | 104                                | 0.6             | 2050^        | -            | 8,9,25     |
| <i>Cryptomys mehowi</i>            | Terrestrial | PA            | 350                | 1.07            | -                                  | -               | 500          | -            | 8,25       |
| <i>Dama dama</i>                   | Terrestrial | PO            | 59166              | 1.02            | 63700                              | 133.0           | 34           | 280          | 3-5,26     |
| <i>Elephas maximus</i>             | Terrestrial | PO            | 4650000            | 1.03            | 4545000                            | 4000            | 60           | -            | 4,8,27     |
| <i>Eptesicus fuscus</i>            | Arboreal    | PO            | 16                 | 0.95            | -                                  | -               | 16800^       | -            | 5,28       |
| <i>Erythrocebus patas</i>          | Terrestrial | PO            | 9740               | 1.08            | 10000                              | 7.2             | 150          | -            | 15         |
| <i>Eulemur fulvus</i>              | Arboreal    | VA            | 1970.00            | 0.99            | 2500                               | 7.8             | 566          | 2532         | 4,9,11,29  |
| <i>Eulemur macaco</i>              | Arboreal    | PO            | 2370.00            | 0.99            | 2500                               | 16.7            | 305          | 2567         | 11,23,29   |
| <i>Eulemur rubriventer</i>         | Arboreal    | MO            | 1980               | 1.00            | 2512                               | 0.9             | 48           | 1545         | 11,30,31   |
| <i>Felis margarita</i>             | Terrestrial | PO            | 3000               | 1.02            | -                                  | -               | 360          | -            | 4,32       |
| <i>Felis nigripes</i>              | Terrestrial | PO            | 1800               | 1.04            | 1983                               | 2.0             | 310          | -            | 2,4,32     |
| <i>Felis silvestris lybica</i>     | Terrestrial | PO            | 5000               | 1.02            | 4528                               | 2.6             | 362          | -            | 2,4,32     |
| <i>Felis silvestris ornata</i>     | Terrestrial | PO            | 3900               | 1.05            | -                                  | -               | 260          | -            | 32         |
| <i>Felis silvestris silvestris</i> | Terrestrial | PO            | 7100               | 1.05            | 4600                               | 1.4             | 300          | -            | 2,4,32     |
| <i>Gazella subgutturosa</i>        | Terrestrial | PO            | 25500              | 1.04            | -                                  | -               | 45           | 382          | 5,33       |
| <i>Gorilla gorilla</i>             | Terrestrial | PO            | 154000             | 1.07            | 168250                             | 26.7            | 166          | -            | 4,23,34    |
| <i>Heterocephalus glaber</i>       | Terrestrial | PA            | 30                 | 1.00            | -                                  | -               | 3000^        | -            | 8,25       |
| <i>Homo sapiens</i>                | Terrestrial | VA            | 74960              | 1.02            | 65650                              | 40.5            | 114          | 1011         | 4,35,36    |
| <i>Hylobates lar</i>               | Arboreal    | MO            | 5900               | 1.01            | 5500                               | 5.5             | 1076         | -            | 4,11,15,37 |
| <i>Hypsignathus monstrosus</i>     | Arboreal    | PO            | 333                | 1.07            | 354                                | 0.2             | 290          | -            | 4,8,38     |
| <i>Indri indri</i>                 | Arboreal    | MO            | 5830               | 0.98            | -                                  | -               | 653          | -            | 11,39      |
| <i>Loxodonta africana</i>          | Terrestrial | PO            | 5374000            | 1.05            | 4365000                            | 4530            | 14           | 51           | 4,8,40,41  |
| <i>Macaca mulatta</i>              | Terrestrial | PR            | 7506               | 1.03            | 9200                               | 46.2            | 160          | 1421         | 4,8,42,43  |
| <i>Marmota flaviventris</i>        | Terrestrial | PO            | 5067               | 1.05            | -                                  | -               | 1275         | -            | 8,44       |
| <i>Meles meles</i>                 | Terrestrial | PR            | 10120              | 1.02            | 14515                              | 14.4            | 14           | -            | 4,5,45     |
| <i>Mesocricetus auratus</i>        | Terrestrial | PO            | 104                | 1.06            | 108                                | 3.2             | 34500        | -            | 4,8,46     |
| <i>Microcebus murinus</i>          | Arboreal    | PO            | 78                 | 1.01            | 70                                 | 2.5             | 23700        | -            | 8,23,47    |
| <i>Microcebus rufus</i>            | Arboreal    | PO            | 43                 | 1.01            | -                                  | -               | 21800^       | -            | 11,48      |
| <i>Mus musculus</i>                | Terrestrial | PO            | 15                 | 0.99            | 15                                 | 0.1             | 62775        | -            | 4,5,49     |
| <i>Odocoileus virginianus</i>      | Terrestrial | PO            | 76616              | 1.03            | 71000                              | 76.0            | 209          | -            | 3-5        |
| <i>Ovibos moschatus</i>            | Terrestrial | PO            | 398000             | 1.02            | -                                  | -               | 89           | 360          | 8,50       |
| <i>Pan troglodytes</i>             | Terrestrial | PR            | 56668              | 1.02            | 45000                              | 139.0           | 718          | 1122         | 8,23,51,52 |
| <i>Panthera leo</i>                | Terrestrial | PO            | 189000             | 1.02            | 188000                             | 55.0            | 195          | 308          | 4,5,53     |
| <i>Panthera tigris</i>             | Terrestrial | PR            | 182000             | 1.04            | -                                  | -               | 29           | -            | 5,54       |
| <i>Papio hamadryas</i>             | Terrestrial | PO            | 29800              | 1.06            | 26400                              | 93.5            | 52           | 998          | 4,8,55     |
| <i>Papio ursinus</i>               | Terrestrial | PO            | 31050              | 1.07            | -                                  | -               | 53           | 738          | 5,56       |
| <i>Phascolarctos cinereus</i>      | Arboreal    | PO            | 7700               | 1.03            | 11100                              | 15.0            | 27           | 354          | 4,5,57     |
| <i>Phodopus sungorus</i>           | Terrestrial | PO            | 37                 | 1.05            | 42                                 | 0.9             | 57600        | -            | 4,8,58     |
| <i>Pongo pygmaeus</i>              | Arboreal    | PO            | 74700              | 1.06            | 74640                              | 35.30           | 412^         | -            | 4,5,59     |
| <i>Procapra gutturosa</i>          | Terrestrial | PO            | 31500              | 1.03            | -                                  | -               | 500          | 564          | 4,60       |
| <i>Procavia capensis</i>           | Terrestrial | PO            | 2738               | 1.00            | -                                  | -               | 1280         | 2766         | 5,61       |
| <i>Rangifer tarandus</i>           | Terrestrial | PO            | 172000             | 1.04            | 145000                             | 132.0           | 55           | -            | 3-5        |
| <i>Rattus rattus</i>               | Terrestrial | PO            | 133                | 1.01            | 169                                | 7.2             | 48916        | -            | 4,6,2,63   |
| <i>Saiga tatarica</i>              | Terrestrial | PO            | 41750              | 1.03            | -                                  | -               | 45           | 407          | 5,64       |
| <i>Spalax ehrenbergi</i>           | Terrestrial | MO            | 170                | 1.03            | -                                  | -               | 550          | -            | 8,25       |
| <i>Suricata suricatta</i>          | Terrestrial | MO            | 760                | 1.01            | 731                                | 1.3             | 566          | 2394         | 4,9,65,66  |
| <i>Theropithecus gelada</i>        | Terrestrial | PO            | 20500              | 1.51            | 20400                              | 17.10           | 111          | 1051#        | 4,5,67     |
| <i>Tupaia belangeri</i>            | Terrestrial | MO            | 229                | 1.04            | -                                  | -               | 7200^        | -            | 68,69      |
| <i>Varecia variegata</i>           | Arboreal    | VA            | 3630               | 1.03            | 4750                               | 17.17           | 222          | 1464         | 4,11,29,70 |

PO = Polygynous, MO = Monogamous, PR = Promiscuous, PA = Polyandrous, VA = Variable.

Data on species habitat were taken from the Encyclopedia of Life website (<http://eol.org/>)

Data on species mating system were taken from the Animal Diversity Website (<http://animaldiversity.org/>)

\* Testes mass in grams was calculated by multiplying the volume in mm<sup>3</sup> by 1.02<sup>-3</sup>.

^ F0 calculated as the mid point between reported minimum and maximum values.

# Formant frequency values measured from a published spectrogram using a clear ruler to extrapolate from the axes.

## Supplementary References

- 1 Charlton, B., Zhang, Z. & Snyder, R. Vocal cues to identity and relatedness in giant pandas (*Ailuropoda melanoleuca*). *J. Acoust. Soc. Am.* **126**, 2721-2732 (2009).
- 2 Iossa, G., Soulsbury, C. D., Baker, P. J. & Harris, S. Sperm competition and the evolution of testes size in terrestrial mammalian carnivores. *Funct. Ecology* **22**, 655-662 (2008).
- 3 Cap, H., Deleporte, P., Joachim, J. & Reby, D. Male vocal behavior and phylogeny in deer. *Cladistics* **24**, 917-931 (2008).
- 4 Morrow, E. H. & Fricke, C. Sexual selection and the risk of extinction in mammals. *Proc. Biol. Sci.* **271**, 2395-2401 (2004).
- 5 Silva, M. & Downing, J. A. *CRC handbook of mammalian body masses*. (CRC press, 1995).
- 6 Reby, D. & Cargnelutti, B. "Des Voix Dans la Fore't. Un Guide Sonore des Cervides d'Europe." Sittelle, Mens. (1999).
- 7 Frommolt, K. H., Goltzman, M. E. & MacDonald, D. W. Barking foxes, Alopex lagopus: field experiments in individual recognition in a territorial mammal. *Anim. Behav.* **65**, 509-518 (2003).
- 8 Jones, K. E. *et al.* PanTHERIA: a species-level database of life history, ecology, and geography of extant and recently extinct mammals. *Ecology* **90**, 2648-2648 (2009).
- 9 Soulsbury, C. D. Genetic patterns of paternity and testes size in mammals. *PLoS ONE* **5**, e9581-9587 (2010).
- 10 Dunn, J. C. *et al.* Evolutionary Trade-Off between Vocal Tract and Testes Dimensions in Howler Monkeys. *Curr Biol* **25**, 2839-2844 (2015).
- 11 Smith, R. J. & Junkers, W. L. Body mass in comparative primatology. *Journal of Human Evolution* **32**, 523-559 (1997).
- 12 Helbig, L., Woodbury, M. R., Haigh, J. C., Collins, J. & Barth, A. D. The seasonal fertility of North American bison (*Bison bison*) bulls. *Anim. Reprod. Sci.* **97**, 265-277.
- 13 Wyman, M. T. (Unpublished).
- 14 Wyman, M. T. *et al.* Acoustic cues to size and quality in the vocalizations of male North American bison, *Bison bison*. *Anim. Behav.* **84**, 1381-1391 (2012).
- 15 Puts, D. A. *et al.* Sexual selection on male vocal fundamental frequency in humans and other anthropoids. *Proc. Biol. Sci.* **283** (2016).
- 16 Riede, T. & Zuberbühler, K. Pulse register phonation in Diana monkey alarm calls. *J. Acoust. Soc. Am.* **113**, 2919-2926 (2003).
- 17 Riede, T., Bronson, E., Hatzikirou, H. & Zuberbühler, K. Vocal production mechanisms in a non-human primate: morphological data and a model. *J. Hum. Evol.* **48**, 85-96 (2005).
- 18 Price, T., Arnold, K., Zuberbühler, K. & Semple, S. Pyow but not hack calls of the male putty-nosed monkey (*Cercopithecus nitidus*) convey information about caller identity. *Behaviour* **146**, 871-888 (2009).
- 19 Reby, D. *et al.* Evidence of biphonation and source-filter interactions in the bugles of male North American elk (*Cervus canadensis*). *J. Exp. Biol.* **In press** (2016).
- 20 Kidjo, N., Cargnelutti, B., Charlton, B. D., Wilson, C. & Reby, D. Vocal behaviour in the endangered Corsican deer, description and phylogenetic implications. *Bioacoustics* **18**, 159-181 (2008).
- 21 Reby, D. & McComb, K. Anatomical constraints generate honesty: acoustic cues to age and weight in the roars of red deer stags. *Anim. Behav.* **65**, 519-530 (2003).
- 22 Minami, M. & Kawamichi, T. Vocal repertoires and classification of the sika deer *Cervus nippon*. *J. Mamm. Soc. Japan* **17**, 71-94 (1992).
- 23 Harcourt, A. H., Purvis, A., Liles, L., Sperm competition: mating system, not breeding season, affects testes size of primates. *Funct. Ecol.* **9**, 468-476 (1995).
- 24 Harris, T. R., Fitch, W. T., Goldstein, L. M. & Fashing, P. J. Black and white colobus monkey (*Colobus guereza*) roars as a source of both honest and exaggerated information about body mass. *Ethology* **112**, 911-920 (2006).
- 25 Credner, S., Burda, H. & Ludescher, F. Acoustic communication underground: vocalization characteristics in subterranean social mole-rats (*Cryptomys* sp., Bathyergidae). *J. Comp. Physiol. A: Neuroethology* **180**, 245-255 (1997).
- 26 McElligott, A. G., Birrer, M. & Vannoni, E. Retraction of the mobile descended larynx during groaning enables fallow bucks (*Dama dama*) to lower their formant frequencies. *J. Zool.* **270**, 340-345 (2006).
- 27 De Silva, S. Acoustic communication in the Asian elephant, *Elephas maximus maximus*. *Behaviour* **147**, 825-852 (2010).
- 28 Gadziola, M. A., Grimsley, J. M. S., Faure, P. A. & Wenstrup, J. J. Social vocalizations of big brown bats vary with behavioral context. *PLoS ONE* **7**, e44550-44516 (2012).
- 29 Gamba, M. (Unpublished).
- 30 Kappeler, P. M. Intrasexual selection and testis size in strepsirrhine primates. *Behav. Ecol.* **8**, 10-19 (1997).
- 31 Gamba, M., Colombo, C. & Giacoma, C. Acoustic cues to caller identity in lemurs: a case study. *J. Ethol.* **30**, 191-196 (2012).
- 32 Peters, G., Baum, L., Peters, M. & Tonkin-Leyhausen, B. Spectral characteristics of intense mew calls in cat species of the genus *Felis* (*Mammalia: Carnivora: Felidae*). *J. Ethol.* **27**, 221-237 (2009).
- 33 Frey, R., Volodin, I., Volodina, E., Soldatova, N. V. & Juldashev, E. T. Descended and mobile larynx, vocal tract elongation and rutting roars in male goitred gazelles (*Gazella subgutturosa* Güldenstaedt, 1780). *J. Anat.* **218**, 566-585 (2011).
- 34 Salmi, R. & Doran-Sheehy, D. M. The function of loud calls (Hoot Series) in wild western gorillas (*Gorilla gorilla*). *Am. J. Phys. Anthropol.* **155**, 379-391 (2014).
- 35 Gage, M. J. G. & Freckleton, R. P. Relative testis size and sperm morphometry across mammals: no evidence for an association between sperm competition and sperm length. *Proc. Biol. Sci.* **270**, 625-632 (2003).
- 36 Pisanski, K. *et al.* Voice parameters predict sex-specific body morphology in men and women. *Anim. Behav.* **112**, 13-22 (2016).
- 37 Barelli, C., Mundry, R., Heistermann, M. & Hammerschmidt, K. Cues to androgens and quality in male gibbon songs. *PLoS ONE* **8**, e82748 (2013).
- 38 Bradbury, J. Lek mating behavior in the hammer-headed bat. *Zeits. Tierpsychol.* **45**, 225-255 (1977).
- 39 Giacoma, C., Sorrentino, V., Rabarivola, C. & Gamba, M. Sex differences in the song of *Indri indri*. *Int. J. Primatol.* **31**, 539-551 (2010).
- 40 Poole, J. H., Payne, K., Langbauer, W. R. & Moss, C. J. The social contexts of some very low frequency calls of African elephants. *Behav. Ecol. Sociobiol.* **22**, 385-392 (1988).
- 41 Stoeger, A. S. & Baotic, A. Information content and acoustic structure of male African elephant social rumbles. *Sci. Rep.* **6**, 1-8 (2016).
- 42 Fitch, W. T. Vocal tract length and formant frequency dispersion correlate with body size in rhesus macaques. *J. Acoust. Soc. Am.* **102**, 1213-1222 (1997).
- 43 Rendall, D., Owren, M. J. & Rodman, P. S. The role of vocal tract filtering in identity cueing in rhesus monkey (*Macaca mulatta*) vocalizations. *J. Acoust. Soc. Am.* **103**, 602-614 (1998).
- 44 Blumstein, D. & Munos, O. Individual, age and sex-specific information is contained in yellow-bellied marmot alarm calls. *Anim. Behav.* (2005).
- 45 Wong, J., Stewart, P. D. & Macdonald, D. W. Vocal repertoire in the European badger (*Meles meles*): Structure, context, and function. *J. Mammal.* **80**, 570-588 (1999).
- 46 Floody, O. R. & Pfaff, D. W. Communication among hamsters by high-frequency acoustic signals: I. Physical characteristics of hamster calls. *J. Comp. Physiol. Psychol.* **91**, 794-806 (1977).
- 47 Zimmermann, E. & Lerch, C. The complex acoustic design of an advertisement call in male mouse lemurs (*Microcebus murinus*) and sources of its variation. *Ethology* **93**, 211-224 (1993).
- 48 Zimmermann, E., Vorobieva, E., Wrogemann, D. & Hafen, T. Use of vocal fingerprinting for specific discrimination of gray (*Microcebus murinus*) and rufous mouse lemurs (*Microcebus rufus*). *Int. J. Primatol.* **21**, 837-852 (2000).
- 49 Gourbal, B. E. F., Barthelemy, M., Petit, G. & Gabrion, C. Spectrographic analysis of the ultrasonic vocalisations of adult male and female BALB/c mice. *Naturwissenschaften* **91**, 1-5 (2004).
- 50 Frey, R., Gebler, A. & Fritsch, G. Arctic roars - laryngeal anatomy and vocalization of the muskox (*Ovibos moschatus* Zimmermann, 1780, *Bovidae*). *J. Zool.* **268**, 433-448 (2006).
- 51 Riede, T., Arcadi, A. C. & Owren, M. J. Nonlinear acoustics in the pant hoots of common chimpanzees (*Pan troglodytes*): Vocalizing at the edge. *J. Acoust. Soc. Am.* **121**, 1758-1767 (2007).
- 52 Slocombe, K. E. & Zuberbühler, K. Functionally referential communication in a chimpanzee. *Curr. Biol.* **15**, 1779-1784 (2005).
- 53 Pfefferle, D., West, P. M., Grinnell, J., Packer, C. & Fischer, J. Do acoustic features of lion, *Panthera leo*, roars reflect sex and male condition? *J. Acoust. Soc. Am.* **121**, 3947-3953 (2007).
- 54 Titze, I. R. *et al.* Vocal power and pressure-flow relationships in excised tiger larynges. *J. Exp. Biol.* **213**, 3866-3873 (2010).
- 55 Pfefferle, D. & Fischer, J. Sounds and size: identification of acoustic variables that reflect body size in hamadryas baboons, *Papio hamadryas*. *Anim. Behav.* **72**, 43-51 (2006).
- 56 Rendall, D., Owren, M., Weerts, E. & Hienz, R. Sex differences in the acoustic structure of vowel-like grunt vocalizations in baboons and their perceptual discrimination by baboon listeners. *J. Acoust. Soc. Am.* (2003).
- 57 Charlton, B. *et al.* Cues to body size in the formant spacing of male koala (*Phascolarctos cinereus*) bellows: honesty in an exaggerated trait. *J. Exp. Biol.* **214**, 3414-3422, doi:10.1242/jeb.061358 (2011).
- 58 Keesom, S. M., Rendon, N. M., Demas, G. E. & Hurley, L. M. Vocal behaviour during aggressive encounters between Siberian hamsters, *Phodopus sungorus*. *Anim. Behav.* **102**, 85-93 (2015).
- 59 Spillmann, B. *et al.* Acoustic properties of long calls given by flanged male orang-utans (*Pongo pygmaeus wurmbii*) reflect both individual identity and context. *Ethology* **116**, 385-395 (2010).
- 60 Frey, R. & Gebler, A. The highly specialized vocal tract of the male Mongolian gazelle (*Procapra gutturosa* Pallas, 1777 - *Mammalia, Bovidae*). *J. Anat.* **203**, 451-471 (2003).
- 61 Koren, L. & Geffen, E. Complex call in male rock hyrax (*Procavia capensis*): a multi-information distributing channel. *Behav. Ecol. Sociobiol.* **63**, 581-590 (2009).
- 62 Haney, M. & Miczek, K. A. Ultrasounds during agonistic interactions between female rats (*Rattus norvegicus*). *J. Comp. Psychol.* **107**, 373-379 (1993).
- 63 White, N. R., Cagiano, R., Moises, A. U. & Barfield, R. J. Changes in mating vocalizations over the ejaculatory series in rats (*Rattus norvegicus*). *J. Comp. Psychol.* **104**, 255-262 (1990).
- 64 Frey, R., Volodin, I. & Volodina, E. A nose that roars: anatomical specializations and behavioural features of rutting male saiga. *J. Anat.* **211**, 717-736 (2007).
- 65 Townsend, S. W., Zöttl, M. & Manser, M. B. All clear? Meerkats attend to contextual information in close calls to coordinate vigilance. *Behav. Ecol. Sociobiol.* **65**, 1927-1934 (2011).
- 66 Townsend, S., Charlton, B. & Manser, M. Acoustic cues to identity and predator context in meerkat barks. *Anim. Behav.* **94**, 143-149, (2014).
- 67 Bergman, T. J. Speech-like vocalized lip-smacking in geladas. *Curr. Biol.* **23**, R268-R269 (2013).
- 68 Schehka, S. & Zimmermann, E. Acoustic features to arousal and identity in disturbance calls of tree shrews (*Tupaia belangeri*). *Behav. Brain Res.* **203**, 223-231 (2009).
- 69 Binz, H. & Zimmermann, E. The vocal repertoire of adult tree shrews (*Tupaia belangeri*). *Behaviour* **109**, 142-162 (1989).
- 70 Pereira, M. E., Seeligson, M. I. & Macedonia, J. The behavioral repertoire of the black-and-white ruffed lemur, *Varecia variegata variegata* (Primates: Lemuridae). *Folia Primatol.* **51**, 1-32 (1988).
